# Supplementary material for: Function of various levels of hierarchical organization of porous Ce0.9REE0.1O1.95 mixed oxides in catalytic activity
Source: Royal Society of Chemistry journal article supplement (doi:10.1039/d0ce00883d), 2020-01-01
Supplement: d0ce00883d1.pdf [file d0ce00883d1.pdf]

## Supplementary materials for

Function of various levels of hierarchical organization of the porous  $\text{Ce}_{0.9}\text{REE}_{0.1}\text{O}_{1.95}$  mixed oxides in the catalytic activity.

**Piotr Woźniak\***, **Włodzimierz Miśta**, **Małgorzata A. Malecka**

*Institute of Low Temperature and Structure Research, Polish Academy of Sciences,*

*P.O. Box 1410, 50-950 Wrocław 2, Poland*

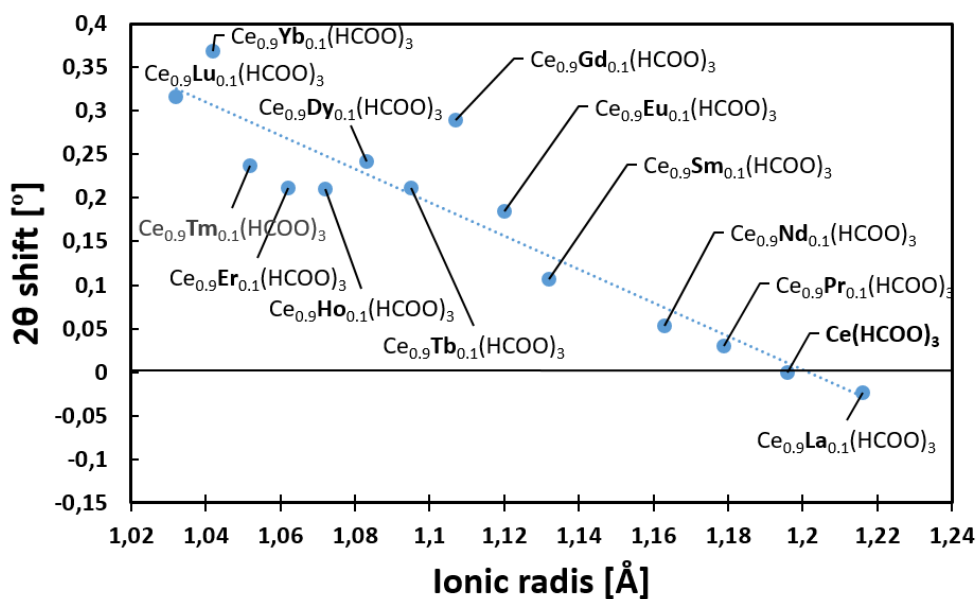

Fig. S1.  $2\theta$  angle shift of (411) peak in  $\text{Ce}_{0.9}\text{Ln}_{0.1}(\text{HCOO})_3$  samples (indicator of lattice constant change) as a function ionic radius (Ln refers to lanthanide ion).

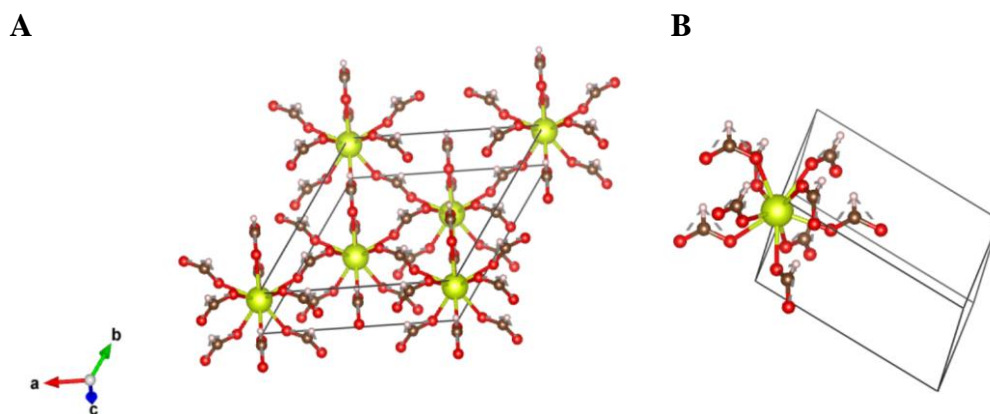

Fig S2. A. Crystal structure of  $\text{Ce}(\text{HCOO})_3$  (ref. ICSD: 237331); colour codes: cerium (yellow), oxygen (red), carbon (brown), hydrogen (white); B.  $\text{Ce}^{3+}(\text{IX})$  surrounded by nine  $\text{HCOO}_3$  molecules.

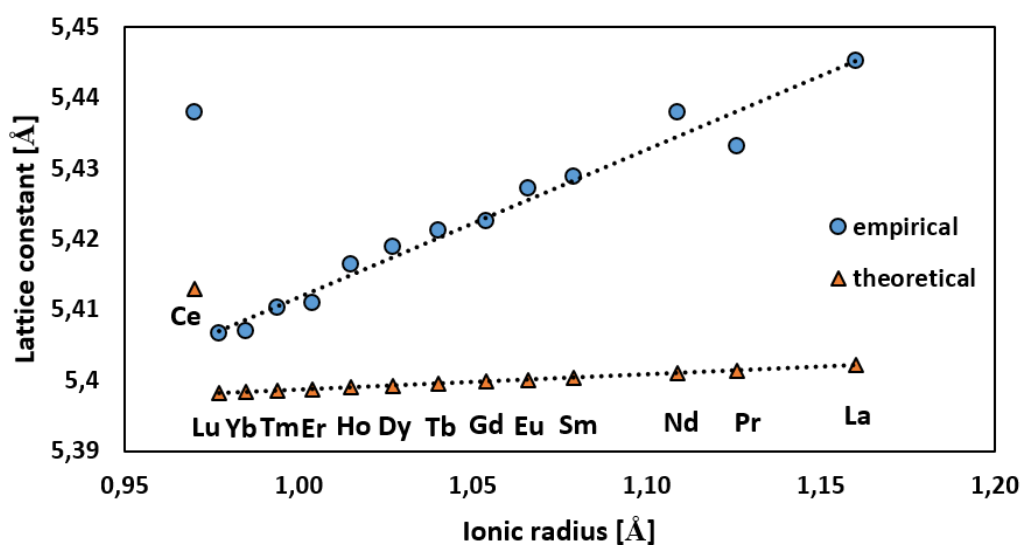

Fig. S3. Lattice constant as a function of ionic radius; Blue circles: Empirical data obtained from Rietveld refinement analysis of PXRD data of star-shaped particles; orange triangles: Lattice constant calculated from Kim's formula for doped cerium oxides [ref. D.-J. Kim, J. Am. Ceram. Soc. 72 (1989) 1415.]

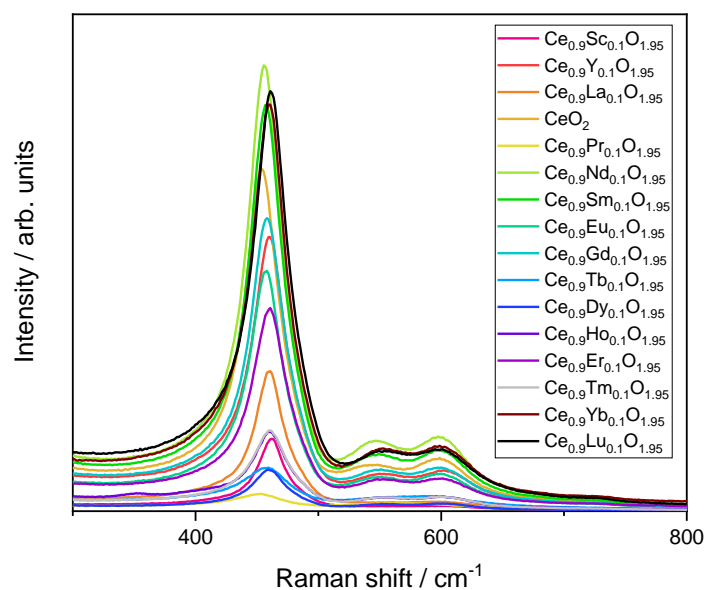

Fig. S4. Raman spectra of star-shaped  $\text{Ce}_{0.9}\text{RE}_{0.1}\text{O}_{1.95}$  samples.

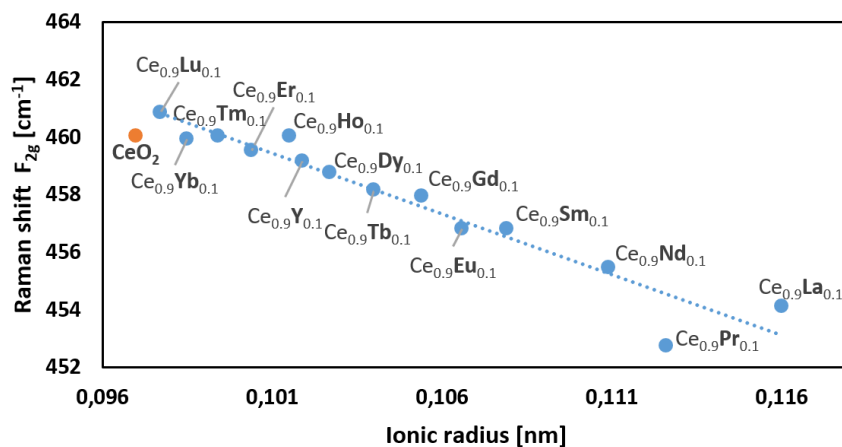

Fig S5. Raman  $F_{2g}$  mode shift for lanthanide series

Shift of  $\text{CeO}_2$   $F_{2g}$  mode from theoretical value of  $465 \text{ cm}^{-1}$  to  $460 \text{ cm}^{-1}$  may be due to crystal size decrease as suggested in [Spanier JE, Robinson RD, Zhang F, Chan SW, Herman IP (2001) Phys Rev B 64:245407].

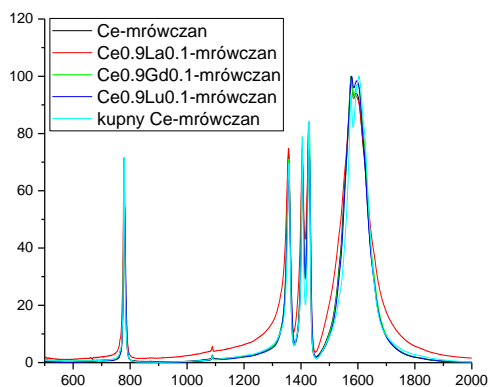

Fig. S6 IR spectra of  $Ce_xRE_{1-x}(HCOO)_3$  samples ( $x=0; 0.1$ ; RE- La, Gd, Lu)

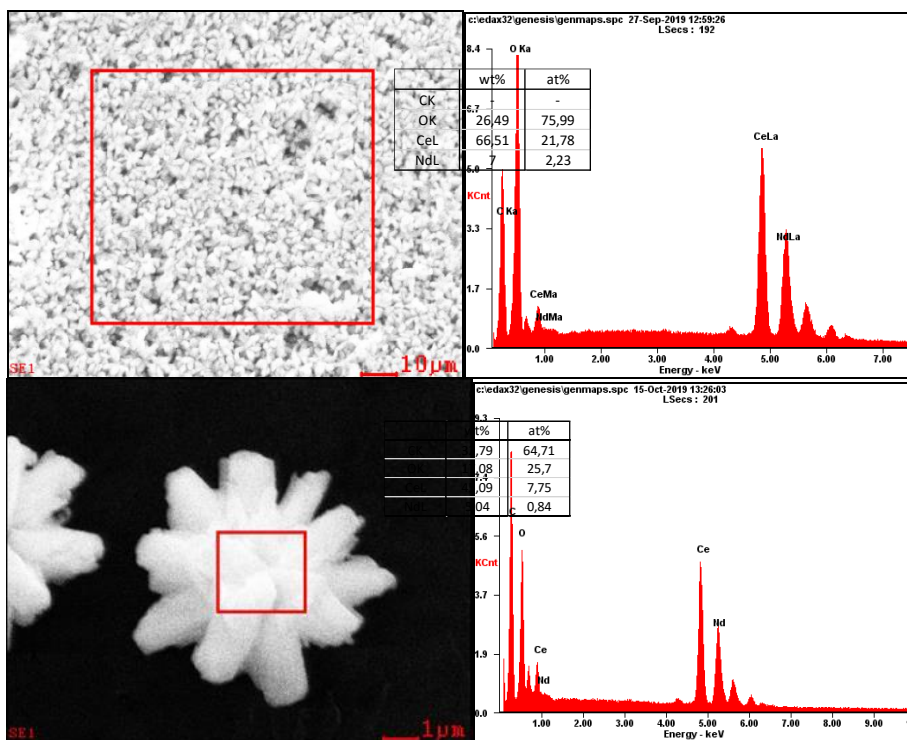

Fig. S7. EDS measurements of  $Ce_{0.9}Nd_{0.1}(HCOO)_3$  sample as a presentation of the way of composition determination; A) Global composition; B) local composition.

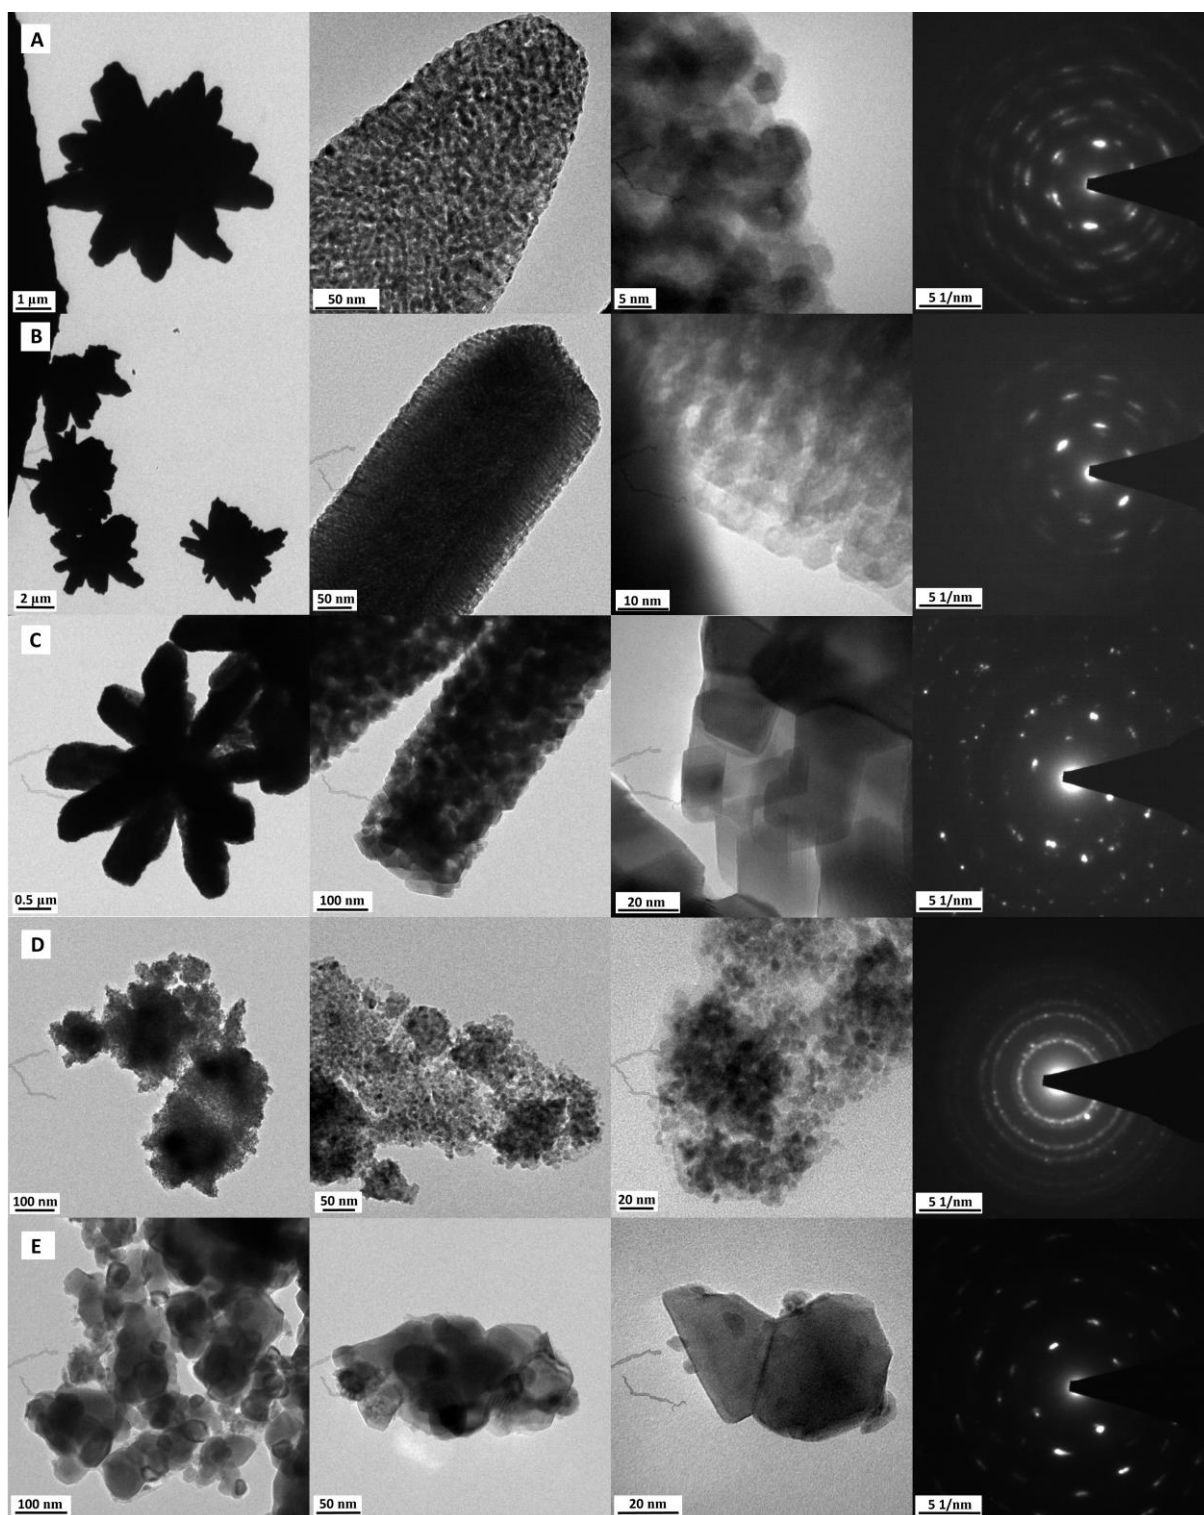

Fig S8. Ceria materials differed by 2<sup>nd</sup> hierarchy level organization of nanocrystallites; A. Undoped star-shaped particles (**CeO<sub>2</sub>\_Star**) heated at 550°C; B. Gadolinium doped star-shaped particles, (**Ce<sub>0.9</sub>Gd<sub>0.1</sub>O<sub>1.95</sub>\_Star**) heated at 550°C); C. Undoped star-shaped particles (**CeO<sub>2</sub>\_Star**) heated at 900°C; D) Microemulsion-derived nanoparticles (**CeO<sub>2</sub>\_NPs**) heated at 550°C; E. Microemulsion-derived nanoparticles (**CeO<sub>2</sub>\_NPs**) heated at 900°C.

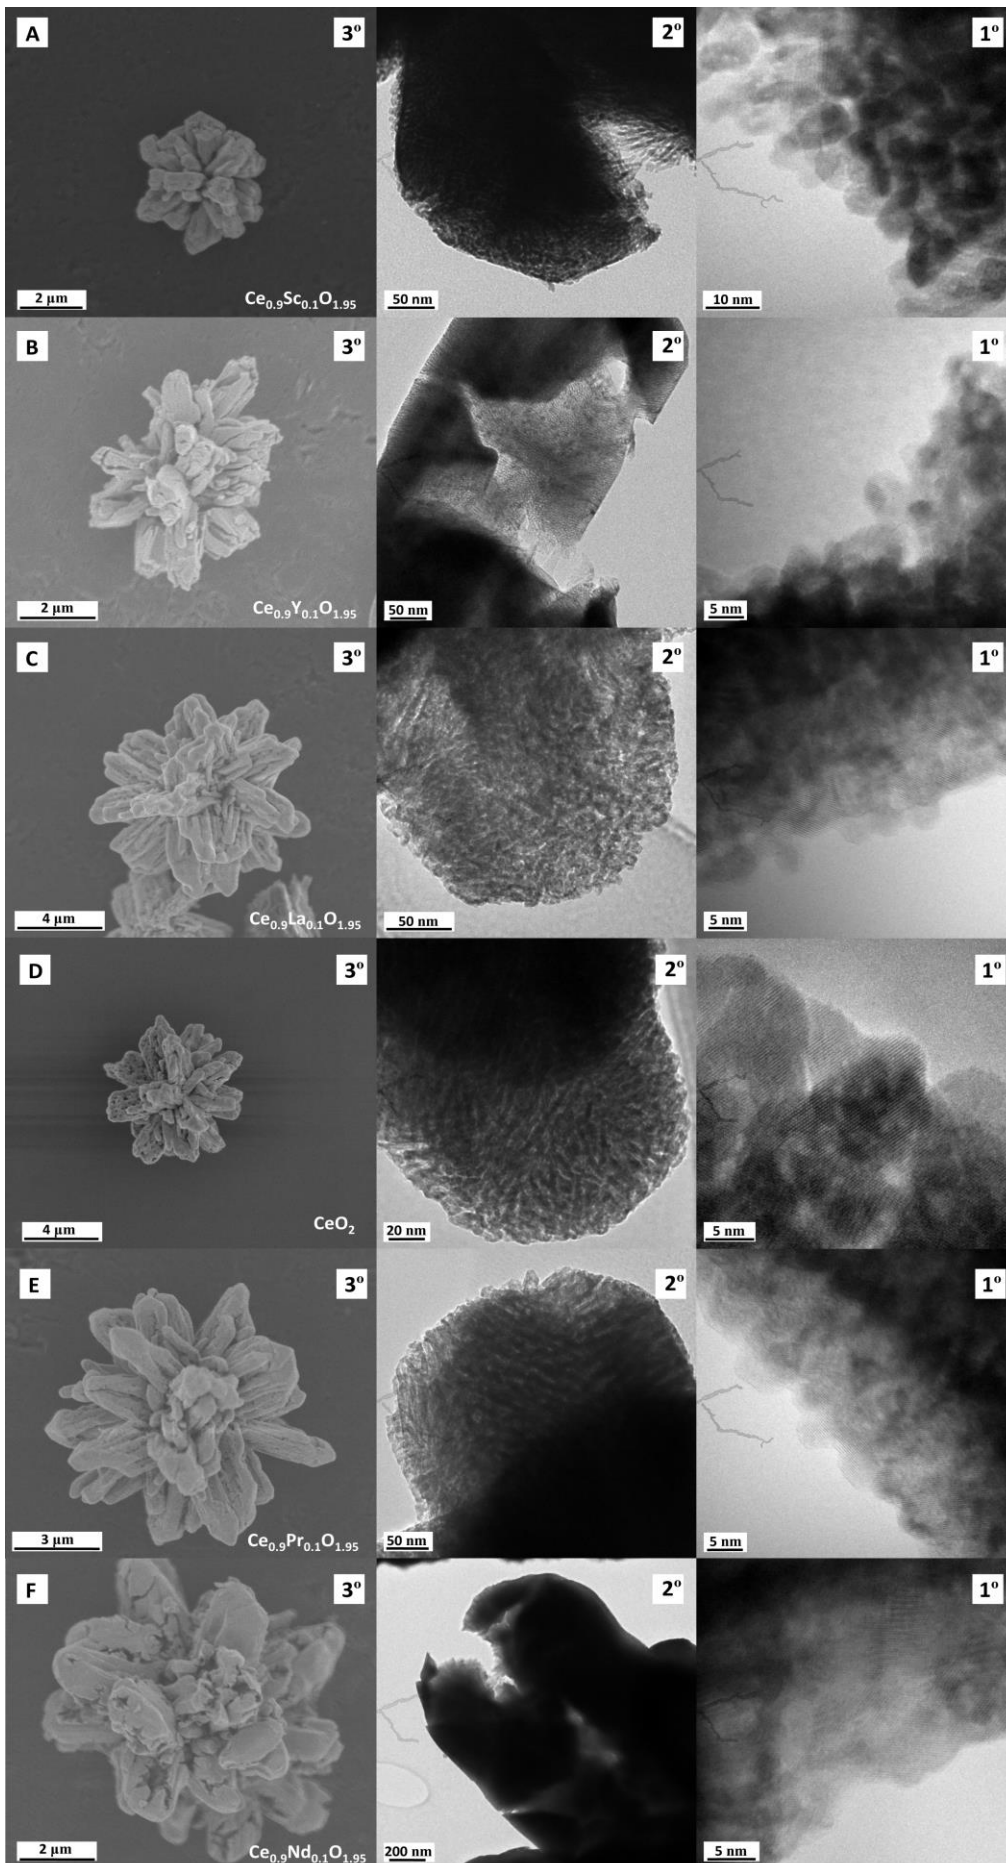



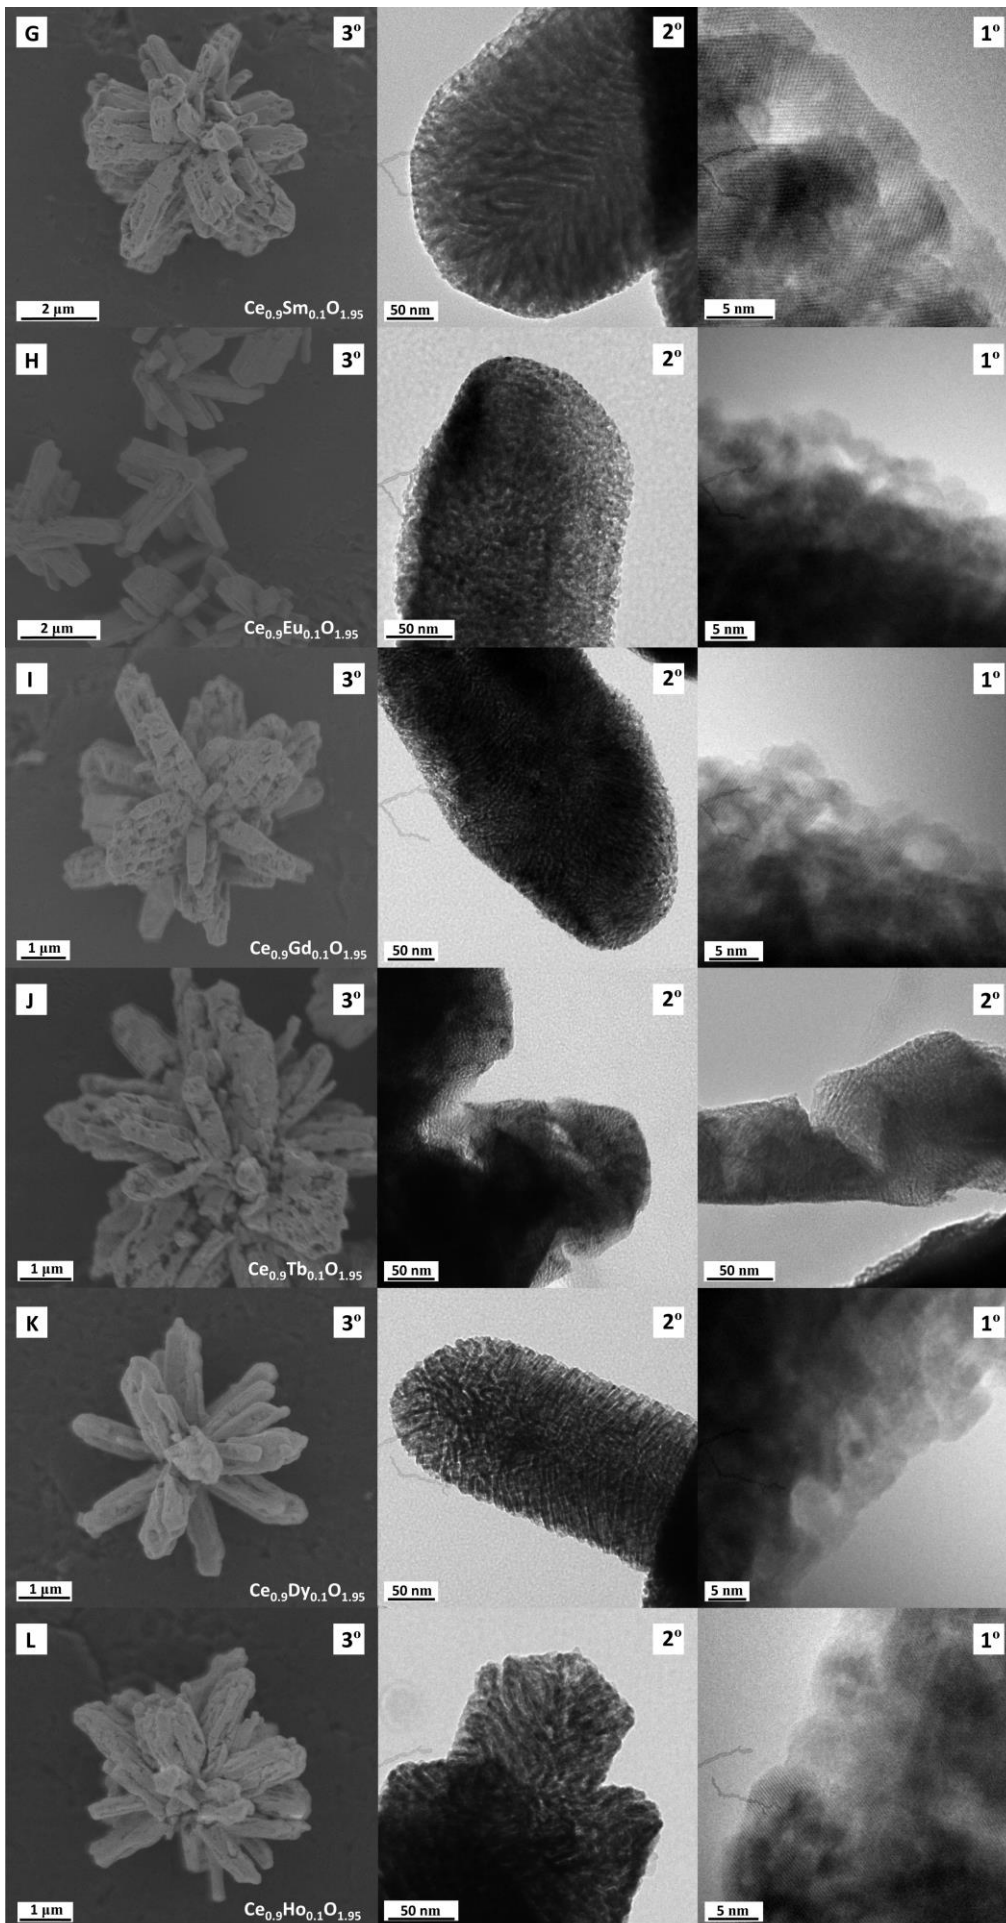

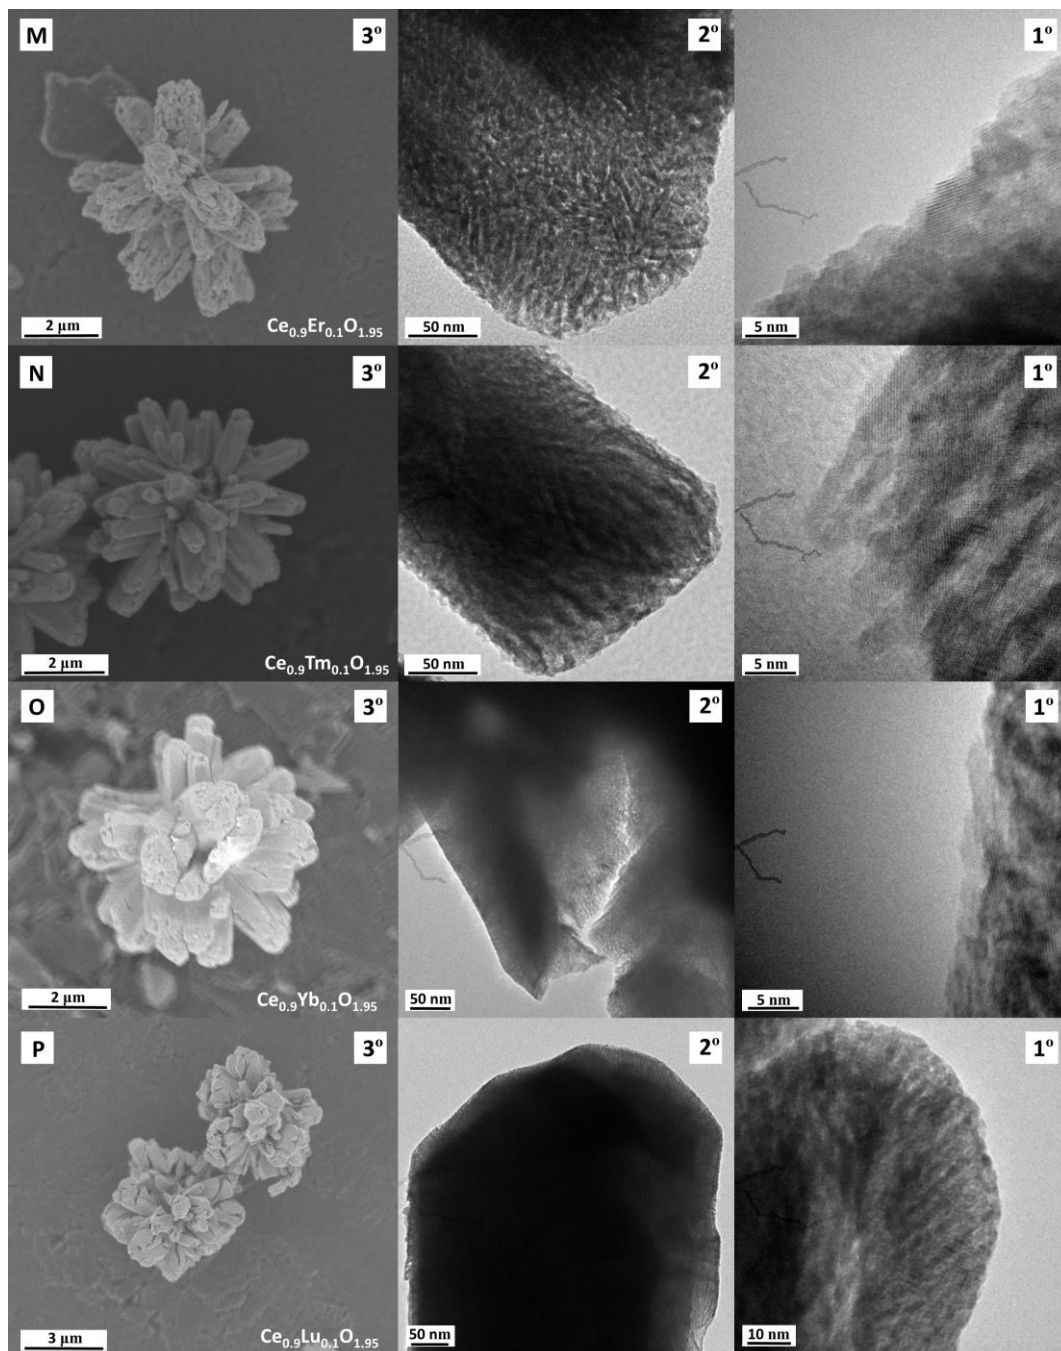

Fig S9. SEM and TEM images showing three-level hierarchical structure of star-like  $\text{Ce}_{0.9}\text{RE}_{0.1}\text{O}_{1.95}$  mixed oxides particles; 1<sup>o</sup> 2<sup>o</sup> 3<sup>o</sup> - first, second and third hierarchy levels respectively; A)  $\text{Ce}_{0.9}\text{Sc}_{0.1}\text{O}_{1.95}$  B)  $\text{Ce}_{0.9}\text{Y}_{0.1}\text{O}_{1.95}$  C)  $\text{Ce}_{0.9}\text{La}_{0.1}\text{O}_{1.95}$  D)  $\text{CeO}_2$  E)  $\text{Ce}_{0.9}\text{Pr}_{0.1}\text{O}_{1.95}$  F)  $\text{Ce}_{0.9}\text{Nd}_{0.1}\text{O}_{1.95}$  G)  $\text{Ce}_{0.9}\text{Sm}_{0.1}\text{O}_{1.95}$  H)  $\text{Ce}_{0.9}\text{Eu}_{0.1}\text{O}_{1.95}$  I)  $\text{Ce}_{0.9}\text{Gd}_{0.1}\text{O}_{1.95}$  J)  $\text{Ce}_{0.9}\text{Tb}_{0.1}\text{O}_{1.95}$  K)  $\text{Ce}_{0.9}\text{Dy}_{0.1}\text{O}_{1.95}$  L)  $\text{Ce}_{0.9}\text{Ho}_{0.1}\text{O}_{1.95}$  M)  $\text{Ce}_{0.9}\text{Er}_{0.1}\text{O}_{1.95}$  N)  $\text{Ce}_{0.9}\text{Tm}_{0.1}\text{O}_{1.95}$  O)  $\text{Ce}_{0.9}\text{Yb}_{0.1}\text{O}_{1.95}$  P)  $\text{Ce}_{0.9}\text{Lu}_{0.1}\text{O}_{1.95}$ .



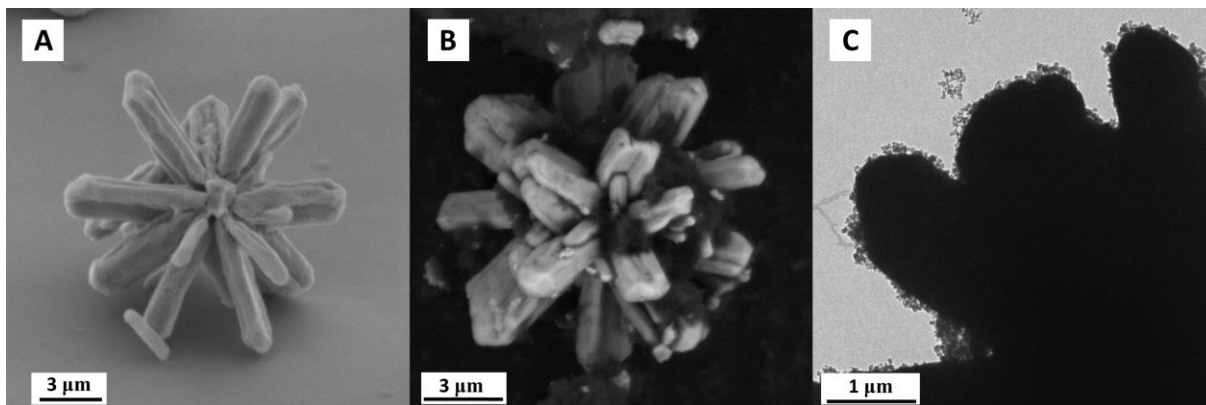

Fig S10. A) SEM image of CeO<sub>2</sub> star-shaped particles before mixing with soot; B) SEM image of CeO<sub>2</sub> star-shaped particle after mixing with soot; C) TEM image of arms of CeO<sub>2</sub> star-shaped particle after mixing with soot.

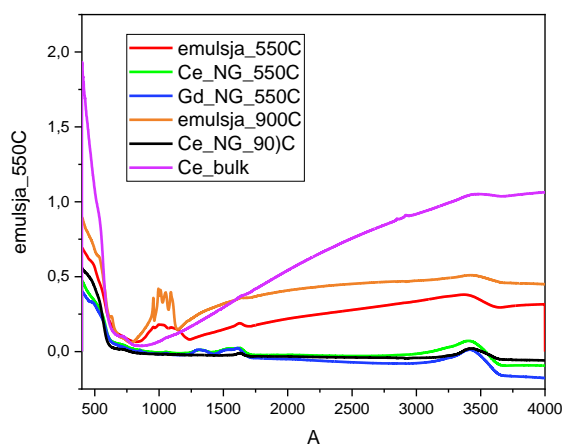

Fig. S11 FT-IR spectra of oxide samples heated at 550 °C (before catalytic tests).

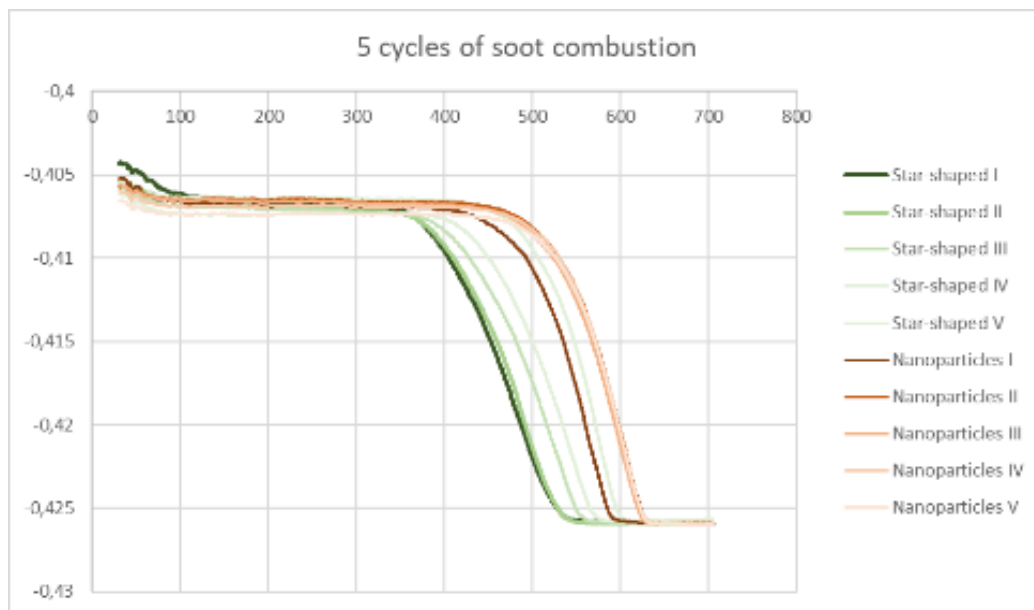

Fig. S12. Five cycles of soot combustion

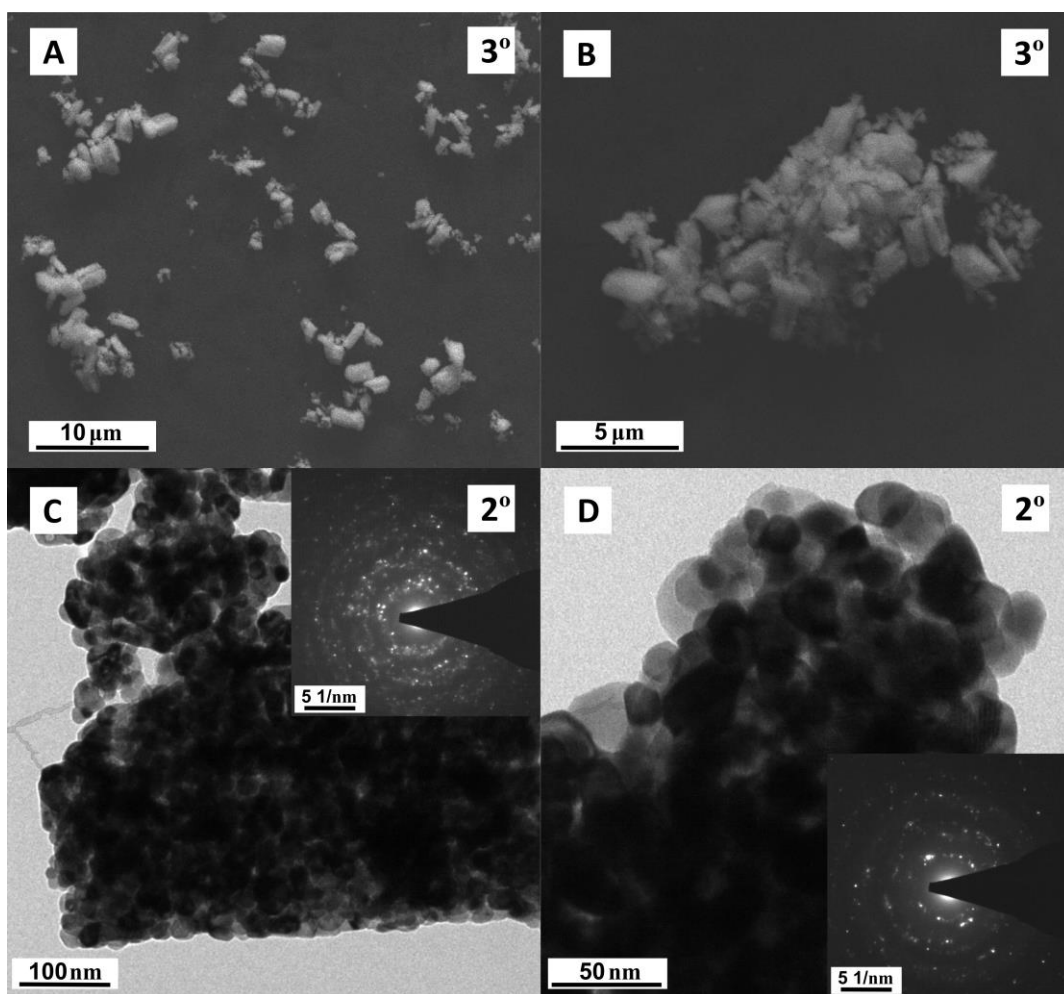

Fig. S13. SEM (A,B) and TEM (C,D) images of  $\text{CeO}_{2-\delta}\text{NG}$  after 5<sup>th</sup> cycle of soot combustion. Loss of  $3^\circ$  (A, B) and  $2^\circ$  structure (inlet SAED patterns on images C and D) is observed.

Table S1. CeO<sub>2</sub> hierarchical architectures and CO oxidation catalytic performance

| Ref. | Hierarchy description                                      |                                                                                                                              | T <sub>50</sub><br>(°C) | T <sub>50</sub> of<br>comparitive<br>material (°C) | Reactant feed                                          | Space<br>velocity<br>(mL g <sup>-1</sup><br>h <sup>-1</sup> ) | BET<br>(m <sup>2</sup> /g) |
|------|------------------------------------------------------------|------------------------------------------------------------------------------------------------------------------------------|-------------------------|----------------------------------------------------|--------------------------------------------------------|---------------------------------------------------------------|----------------------------|
| [16] | 3 <sup>rd</sup><br>2 <sup>nd</sup><br>1 <sup>st</sup>      | Nanobundles<br>(0,5-1,2 μm <sup>b</sup> /2-4 μm <sup>a</sup> )<br>Nanorods (<30nm)<br>Nanoparticles (5.4<br>nm) <sup>d</sup> | 213                     | 261<br><br>(ceria<br>nanoparticles)                | 5% CO,<br>CO/O <sub>2</sub> =0.15 in<br>N <sub>2</sub> | 80000                                                         | 130.4                      |
| [17] | 3 <sup>rd</sup><br>2 <sup>nd</sup><br>&<br>1 <sup>st</sup> | Globin-like spheres<br>(2-3 μm)<br>Nano-sized<br>& building blocks<br>interconnected by<br>nanoparticles                     | 162                     | 272<br><br>(calcined cerium<br>nitrate)            | 2% CO, 18%<br>O <sub>2</sub> , in N <sub>2</sub>       | 18000                                                         | 57.13                      |
| [20] | 3 <sup>rd</sup><br>2 <sup>nd</sup><br>1 <sup>st</sup>      | Flowerlike spheres<br>(5-8 μm)<br>Nanowires (~6 nm) <sup>c</sup><br>Nanoparticles (~6 nm)                                    | 227                     | 270<br><br>(bulk ceria)                            | 1% CO, 20% O <sub>2</sub><br>in Ar                     | 60000                                                         | 64.2                       |
| [24] | 3 <sup>rd</sup><br>2 <sup>nd</sup><br>1 <sup>st</sup>      | Spindle-like (2-5<br>μm) / flower-like<br>(5 μm)<br>Nanoflakes<br>Nanocrystallites<br>(9.4 nm)                               | 239                     | 332<br><br>(commercial<br>ceria)                   | 1% CO, 1% O <sub>2</sub><br>in N <sub>2</sub>          | 120000                                                        | 171.6                      |
| [21] | 3 <sup>rd</sup><br>2 <sup>nd</sup><br>1 <sup>st</sup>      | Flower-like (5 μm)<br>Nanorods (20-40<br>nm <sup>c</sup> /1-2 μm <sup>a</sup> )<br>- <sup>e</sup>                            | -                       | -                                                  | -                                                      | -                                                             | -                          |
| [18] | 3 <sup>rd</sup><br>2 <sup>nd</sup><br>1 <sup>st</sup>      | Urchin-like (2.5-3<br>μm)<br>Nanorods (50 nm <sup>c</sup> /1<br>μm <sup>a</sup> )<br>- <sup>e</sup>                          | ~400                    | ~465<br><br>(commercial<br>CeO <sub>2</sub> )      | 1% CO, 10%<br>O <sub>2</sub> in N <sub>2</sub>         | 120000                                                        | 115.2                      |
| [18] | 3 <sup>rd</sup><br>2 <sup>nd</sup><br>1 <sup>st</sup>      | Coral-like (500-<br>600 nm)<br>Nanorods (50 nm <sup>c</sup> /<br>200 nm <sup>a</sup> )<br>- <sup>e</sup>                     | ~375                    | ~465<br><br>(commercial<br>CeO <sub>2</sub> )      | 1% CO, 10%<br>O <sub>2</sub> in N <sub>2</sub>         | 120000                                                        | 139.3                      |
| [22] | 3 <sup>rd</sup><br>2 <sup>nd</sup><br>1 <sup>st</sup>      | Nanoflowers (250<br>nm)<br>Nanorods (100<br>nm <sup>a</sup> /30 nm <sup>c</sup> )<br>Nanocrystals (4.8<br>nm <sup>d</sup> )  | ~230                    | -                                                  | 1% CO, 10%<br>O <sub>2</sub> in N <sub>2</sub>         | 36000                                                         | 95.7                       |
| [80] | 3 <sup>rd</sup><br>2 <sup>nd</sup><br>1 <sup>st</sup>      | Nanoparticles (500<br>nm)<br>Hollow nanocones<br>Nanocrystallites<br>(3-5 nm)                                                | ~200                    | ~300<br><br>(commercial<br>ceria)                  | 1% CO, 10%<br>O <sub>2</sub> in N <sub>2</sub>         | 72000                                                         | 147.6                      |
| [23] | 3 <sup>rd</sup><br>2 <sup>nd</sup><br>1 <sup>st</sup>      | Microflowers (3<br>μm)<br>Microrods<br>(600nm <sup>c</sup> /2-3 μm <sup>a</sup> )<br>Nanocrystallites<br>(3-5 nm)            | ~230                    | ~350<br><br>(commercial<br>ceria)                  | 1% CO, 10%<br>O <sub>2</sub> in N <sub>2</sub>         | 96000                                                         | 147.6                      |
| [19] | 3 <sup>rd</sup><br>2 <sup>nd</sup>                         | Sea urchin- like<br>(10-50 μm)<br>Rods (50 μm <sup>a</sup> /1-5                                                              | 317                     | -                                                  | 0.25% CO,<br>0.50% O <sub>2</sub> in<br>N <sub>2</sub> | 96000                                                         | 179 -<br>234               |

|      |                                                       |                                                                                                   |                                                          |                                                    |                                               |       |                                                              |
|------|-------------------------------------------------------|---------------------------------------------------------------------------------------------------|----------------------------------------------------------|----------------------------------------------------|-----------------------------------------------|-------|--------------------------------------------------------------|
|      | 1 <sup>st</sup>                                       | $\mu\text{m}^{\text{c}}$<br>Nanocrystallites<br>(10.3-14.7)                                       |                                                          |                                                    |                                               |       |                                                              |
| [29] | 3 <sup>rd</sup><br>2 <sup>nd</sup><br>1 <sup>st</sup> | Flowerlike spheres<br>(0,5- 10 $\mu\text{m}$ )<br>Wrinkled petals<br>Nanocrystallites<br>(<10 nm) | ~255<br>CeO <sub>2</sub><br>~290<br>CeLa<br>~225<br>CePr | T <sub>20</sub> ≈~400<br><br>(commercial<br>ceria) | 2% CO, 3% O <sub>2</sub><br>in N <sub>2</sub> | 60000 | 166<br>(CeO <sub>2</sub> )<br>155<br>(CeLa)<br>140<br>(CePr) |

<sup>a</sup> length, <sup>b</sup> width, <sup>c</sup> diameter, <sup>d</sup> mean grain size calculated by Scherrer equation, <sup>e</sup> no information
